# Supplementary material for: A randomized, double-blind, placebo-controlled pilot trial of low-intensity pulsed ultrasound therapy for refractory angina pectoris
Source: PubMed Central journal article supplement (PMC10289346; doi:10.1371/journal.pone.0287714), 2023-06-23

# Appendix Figure A

## Correlation between the Extent of Baseline Myocardial Ischemia and That of Post-treatment Changes in Myocardial Ischemia

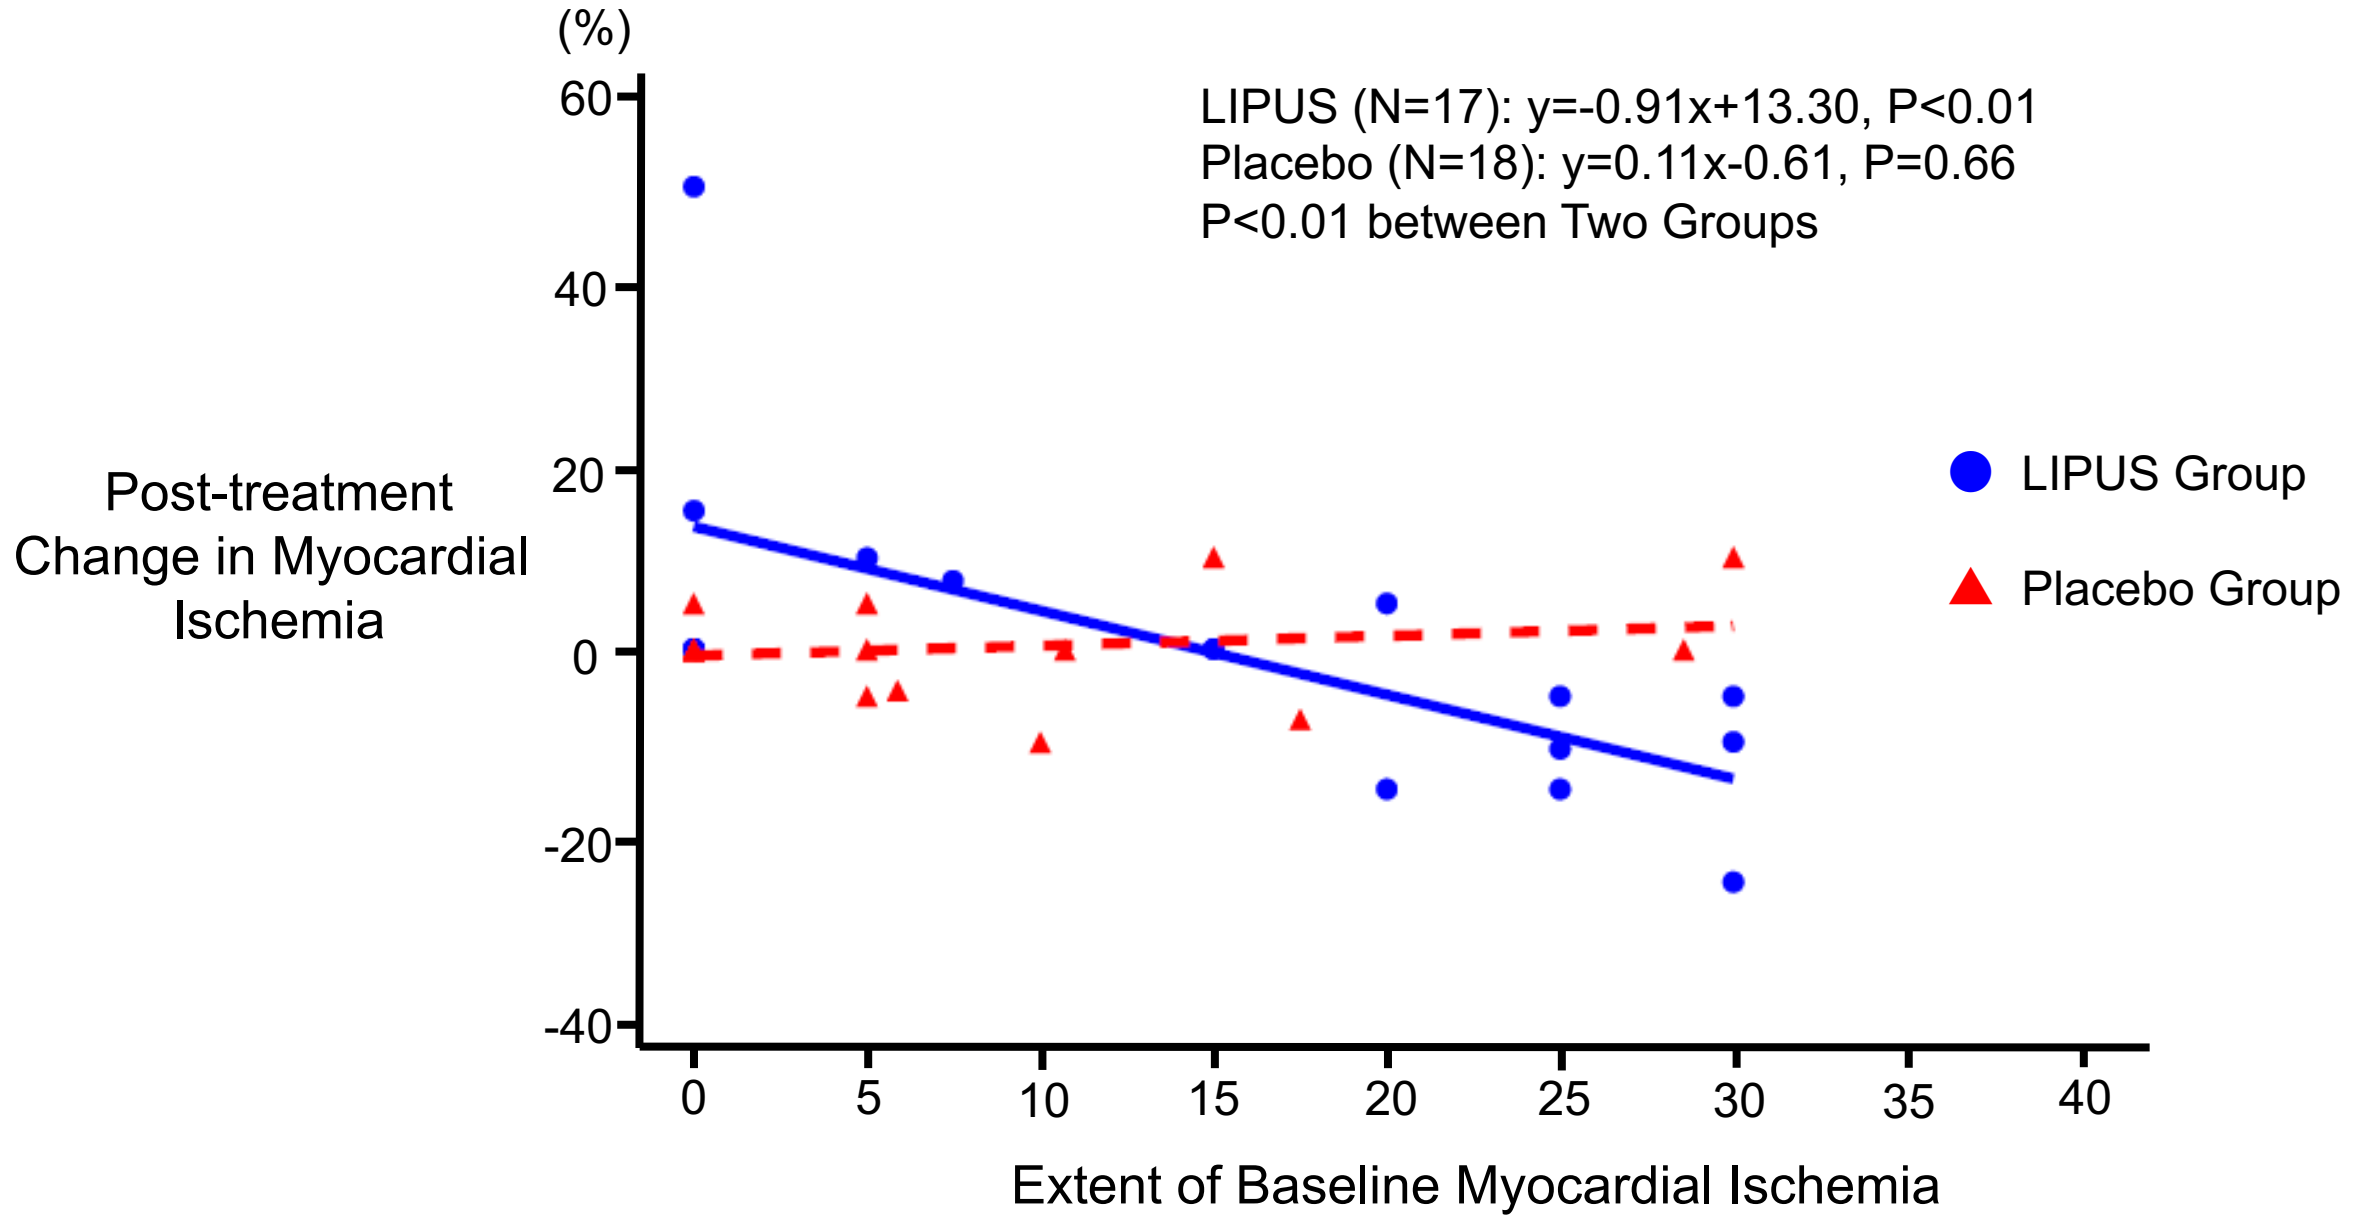

Supplement: pone.0287714.s003.pdf [file pone.0287714.s003.pdf]
